# Supplementary material for: The Reference Genome of the Halophytic Plant Eutrema salsugineum
Source: Front Plant Sci. 2013 Mar 21;4:46. doi: 10.3389/fpls.2013.00046 (PMC3604812; doi:10.3389/fpls.2013.00046)
Supplement: Supplementary Table S2 — microRNA gene families related to stress-response pathways computationally predicted in E. salsugineum. [file 45219_Schumaker_DataSheet2.XLSX]

## Sheet: Sheet1
Table S2. microRNA gene families related to stress-response pathways predicted in E. salsugineum
miRNA family	Arabidopsis thaliana				Eutrema salsugineum				Potential function	Reference
	miRBase ID	Mature sequences	Locations	Pre-miRNA hairpin	miRBase ID	Mature sequences	Locations	Pre-miRNA hairpin
miR-399	ath-miR399a	UGCCAAAGGAGAUUUGCCCUG	chr2:14442968:14443086:-	yes	tha-miR399a	UGCCAAAGGAGAUUUGCCCCG	scaffold_5:5086916:5087093:+	yes	Ca2+/H+ transporters CAX1 and CAX3 depended miR399/PHO2-independent signaling pathway, larger dosage of miR399 increase the concentration of Pi in shoot.	Plant Physiol. 2011 July; 156(3): 1176–1189
	ath-miR399b	UGCCAAAGGAGAGUUGCCCUG	chr2:14443496:14443623:+	yes	tha-miR399b	CUGCCAAAGGAGAUUUGCCCG	scaffold_5:5084189:5084325:-	yes
	ath-miR399d	UGCCAAAGGAGAUUUGCCCCG	chr2:14444989:14445125:+	yes	tha-miR399c	CUGCCAAAGGAGAUUUGCCCG	scaffold_5:5074157:5074294:-	yes
	ath-miR399c	UGCCAAAGGAGAGUUGCCCUG	chr5:24962485-24962598:+	na	tha-miR399d	CUGCCAAAGGAGAUUUGCCCG	scaffold_5:5071841:5071990:-	yes
	ath-miR399e	UGCCAAAGGAGAUUUGCCUCG	chr1:10227065:10227206:+	yes	tha-miR399e	CUGCCAAAGGAUAUUUGCCCC	scaffold_10:7646020:7646143:-	yes	Target on E2 ubiquiting-conjugating protein (E2-UBC)	PLoS ONE 2(2): e219. doi:10.1371/journal.pone.0000219
	ath-miR399f	UGCCAAAGGAGAUUUGCCCGG	chr1:23345367:23345520:-	yes	tha-miR399f	UGCCAAAGGAGAUUUGCCUCG	scaffold_10:7646610:7646732:+	yes
					tha-miR399g	UGCCAAAGGAGAUUUGCCCGG	scaffold_10:7648401:7648519:+	yes
					tha-miR399h	CGGCCAAAGUAGAUUUGCCAU	scaffold_14:3980690:3980811:-	yes
					tha-miR399i	UUGCCAAAGGAGAGUUGCCCU	scaffold_6:2179554:2179695:-	yes
					tha-miR399j	UGUCAAGUGAGAUUUGCCCUG	scaffold_12:9986857:9986946:+	unlikely
miR-168	ath-miR168a	UCGCUUGGUGCAGGUCGGGAA	chr4:10578632:10578778:+	yes	tha-miR168b	UUCGAUUGAUGCAGGUCGGGA	scaffold_1:14102598:14102720:-	yes	Target on AGO1, the central component of RISC complex. AGO1 and miR168 forms a feedback loop	The EMBO Journal (2010) 29, 3507 - 3519
	ath-miR168b	UUCGCUUGGUGCAGGUCGGGA	chr5:18358783:18358914:-	yes	tha-miR168c	UUCGCUUGGUGCAGCUCGGGA	scaffold_1:14128832:14128954:-	yes
					tha-miR168d	UUCGCUUGAUGCAGGUCGGGA	scaffold_1:14140545:14140667:-	yes
					tha-miR168e	UUCGCUUGGUGCAGGUCGGGA	scaffold_1:14148037:14148157:-	yes	down regualted (-2.08 fold) miRNA in drought-stressed arabidosis	J. Exp. Bot. (2010) 61 (15): 4157-4168
					tha-miR168f	UUCGCUUGGUGCAGGUCGGGA	scaffold_20:1047212:1047353:-	yes
					tha-miR168a	UUCGCUUGGUGCAGGUCGGGA	scaffold_1:8872731:8872873:-	yes
miR-395	ath-miR395e	ACUGAAGUGUUUGGGGGAACU	chr1:26272766:26272879:-	yes	tha-miR395a	CUGAAGUGUUUGGGGGGACUC	scaffold_5:6682157:6682283:+	yes	increase translocation of sulfate to the shoots	Plant J. 2011 Jun;66(5):863-76
	ath-miR395f	CUGAAGUGUUUGGGGGGACUC	chr1:26273850:26273980:+	yes	tha-miR395b	ACUGAAGUGUUUGGGGGAACU	scaffold_5:6676064:6676174:-	yes
	ath-miR395d	ACUGAAGUGUUUGGGGGAACU	chr1:26269969:26270087:-	yes	tha-miR395c	CUGAAGUGUUUGGGGGGACUC	scaffold_5:6677665:6677788:+	yes
	ath-miR395a	ACUGAAGUGUUUGGGGGAACU	chr1:9363186:9363297:-	yes	tha-miR395d	ACUGAAGUGUUUGGGGGGACU	scaffold_9:4871560:4871690:-	yes
	ath-miR395b	CUGAAGUGUUUGGGGGGACUC	chr1:9364463:9364581:+	yes	tha-miR395e	CUGAAGUGUUUGGGGGAACUC	scaffold_9:4872650:4872763:+	yes
	ath-miR395c	CUGAAGUGUUUGGGGGGACUC	chr1:9367072:9367190:+	yes	tha-miR395f	ACUGACGUGUUUGGGGGGACU	scaffold_9:4881870:4882000:-	yes
					tha-miR395g	CUGAAGUGUUUGGGGGAACUC	scaffold_9:4882964:4883077:+	yes
					tha-miR395h	CUGAAGUGUUUGGGGGAACUC	scaffold_9:4897169:4897282:+	yes
miR-169	ath-miR169i	GUAGCCAAGGAUGACUUGCCU	chr3:9871979:9872147:-	yes	tha-miR169a	UAGCCAAGGAUGACUUGCCGG	scaffold_14:4172283:4172531:+	yes	overexpressing MIR169a accumulated less N and were more sensitive to N stress than the wild type	New Phytol. 2011 Jun;190(4):906-15. doi: 10.1111/j.1469-8137.2011.03647.x.
	ath-miR169j	GUAGCCAAGGAUGACUUGCCU	chr3:9872086:9872395:-	yes	tha-miR169b	UAGCCAAGGAUGACUUGCCUG	scaffold_14:4179649:4179836:+	yes
	ath-miR169k	GUAGCCAAGGAUGACUUGCCU	chr3:9875548:9875716:-	yes	tha-miR169c	CAGCCAAGGAUGACUUGCCGG	scaffold_6:3362862:3363015:+	yes
	ath-miR169l	AUAGCCAAGGAUGACUUGCCU	chr3:9875892:9876081:-	yes	tha-miR169d	UAGCCAAGGAUGACUUGCCUA	scaffold_6:6265427:6265598:+	yes
	ath-miR169m	GUAGCCAAGGAUGACUUGCCU	chr3:9878298:9878601:-	yes	tha-miR169e	CAGCCAAGGAUGACUUGCCGA	scaffold_13:5033375:5033602:+	yes
	ath-miR169h	GUAGCCAAGGAUGACUUGCCU	chr1:6695442:6695585:-	yes	tha-miR169f	UCACCAAAGAUGACUUGCCUG	scaffold_5:8833663:8833785:+	yes
	ath-miR169a	UAGCCAAGGACAACUUGCCGA	chr3:4358992:4359225:+	yes					In rice, some members of the miR169 family were induced by drought (Zhao et al. 2007) and salt stresses (Zhao et al. 2009	Biotechnol Lett (2011) 33:403–409 DOI 10.1007/s10529-010-0436-0
	ath-miR169b	CAGCCAAGGAUGACUUGCCGG	chr5:8527491:8527634:+	yes
	ath-miR169c	UCAGCCAAGGAUGACUUGCCG	chr5:15870653:15870909:-	yes
	ath-miR169d	ugagccaaggaugacuugccg	chr1:20039463-20039616:-	na
	ath-miR169e	ugagccaaggaugacuugccg	chr1:20041518-20041734:+	na
	ath-miR169f	ugagccaaggaugacuugccg	chr3:4805684-4805850:-	na
	ath-miR169g	ugagccaaggaugacuugccg	chr4:11482879-11483257:-	na
miR-396	ath-miR396a	CUUCCACAGCUUUCUUGAACU	chr2:4142311:4142484:-	yes	tha-miR396	UUCCCACAGCUUUAUUGAACU	scaffold_11:11322329:11322500:-	yes	After 4 h of drought, levels of miR396 transiently decreased	Planta. 2011 Mar;233(3):471-84. Epub 2010 Nov 11
	ath-miR396b	UUCCCACAGCUUUCUUGAGCU	chr5:13611786:13611943:-	yes
	na	UUCCACUUCUUUCUUGUACUG	chr3:22034320:22034568:+	yes					negatively regulating the expression of ceramidase-like genes	Progress in Natural Science Volume 19, Issue 6, 10 June 2009, Pages 781-785
miR-172	ath-miR172d	AGAAUCUUGAUGAUGCUGCAG	chr3:20587901:20588032:+	yes	tha-miR172	GAGAAUCUUGAUGAUGCUGCA	scaffold_16:222556:222688:-	yes	down regualted miRNA in drought-stressed arabidosis	J. Exp. Bot. (2010) 61 (15): 4157-4168
	ath-miR172c	UGAAUCUUGAUGAUGCUCCAA	chr3:3599773:3599914:+	yes
	ath-miR172e	GGAAUCUUGAUGAUGCUGCAU	chr5:23988464:23988607:+	yes					down-regulated by Pi starvation in tomato	Physiol Plant. 2010 Feb;138(2):226-37
	ath-miR172b	GCAGCAUCAUCAAGAUUCUC	chr5:1188193:1188320:+	yes
	ath-miR172a	UGAAUCUUGAUGAUGCCACAG	chr2:11942900:11943033:+	yes
miR-419	ath-miR419	UUAUGAAUGCUGAGGAUGUUG	chr4:15660363:15660482:+	yes	tha-miR419a	AUAUGAAUUCUGAGGAUGUUU	scaffold_8:6990701:6990847:+	yes	response to temperature	http://bioinformatics.cau.edu.cn/cgi-bin/PMRD/further/detail.cgi?identifier=ath-MIR419
	na	UAUAUGAAUUCUGAGGAUGUU	chr1:21460165:21460335:-	yes	tha-miR419b	UCAUGAGUGAUGAGGAUGUUG	scaffold_13:4898076:4898301:+	yes
	na	AUAUGAUUGAUGAGGAUGUUG	chr1:5837989:5838238:+	unlikely
	na	UGAUGAAUGAUGAGGAUGUUG	chr5:15860730:15860936:+	yes
miR-862	ath-miR862	AUAUGCUGGACUUACUUGAAG	chr2:10717785:10718147:+	yes	tha-miR862	AUAUGAUGGUUUUACUUGAAG	scaffold_2:1842417:1842775:+	yes	miR862-3p in the roots was reduced under both Pi deficiency (−P)	Physiologia Plantarum 138: 226–237. 2010
	na	AUAUCUUUGAUCUACUUGAAG	chr1:16499711:16499784:+	yes
miR-863	na	AUUAUGCAUUGUUUAUCUCAA	chr5:8720164:8720318:-	yes	tha-miR863a	UUAAGUUUUGUUGUUCUCAAU	scaffold_1:4356847:4357170:+	yes	target on Kinase, Legumain (C13 protease)	PLoS ONE. 2007; 2(2): e219.
	ath-miR863	AUUGAGAUCAACAAGACAUAA	chr4:7846623:7846875:-	yes	tha-miR863b	AUUGAGAACAACAAAACUUAA	scaffold_1:4356597:4356887:-	yes
					tha-miR863c	UUGAUAGAAACAAGACAUGAU	scaffold_13:5245149:5245549:+	yes
					tha-miR863d	AUUCCGUCUUGUUGAUCUCAA	scaffold_13:8999548:8999672:-	yes
					tha-miR863e	UUUAUUACUUCUUGAUCUCAA	scaffold_11:957466:957630:-	yes
					tha-miR863f	UUAAGAGCAAUAAGACUUAAU	scaffold_24:1238603:1238677:+	yes
miR835	ath-miR835	AUGGAGAAGAUACGCAAGAAA	chr1:28544451:28544825:-	yes	tha-miR835	GUGGAAAAGAUACUCAAGAAU	scaffold_2:11146882:11147276:-	yes	target on five MYB trancription factors and three F-box family proteins	Genes Dev. 2006 December 15; 20(24): 3407–3425.
	na	UUCAUGCUUAUGUUCUUUUUC	chr5:1291281:1291500:+	yes
	na	UUCUUGCAUAUGUUCUCUGAC	chr2:18458830:18459183:+	yes
	na	GAGGAGAAGAUACAAAAGAAA	chr3:1893550:1893771:-	yes
	na	UUUCUUUCAUAUUGUCUUUAU	chr1:7676487:7676608:-	yes
miR858	na	UUUCGUUGUCUGUUCUUCCUG	chr5:19999796:19999897:+	yes	tha-miR858	AUUUCGUUGUCUGUUCUUCCU	scaffold_6:4661302:4661429:-	yes	MYB12 (At2g47460, R2R3-MYB family) genes	PLoS One. 2007 Feb 14;2(2):e219
	ath-miR858	CUUCGUUGUCUGUUCGACCUU	chr1:26772635:26772937:+	yes
	na	GUUUCGUUGUCUGUUCGACCU	chr1:26773537:26773726:-	yes
	na	AUUUCGUUGUCUGUUCGUCCA	chr1:1890358:1890669:-	unlikely
miR774	ath-miR774b	CAUCCAUAUUUUCAUCUCGAA	chr1:22150140:22150255:+	yes	tha-miR774	ACAUUCAUAUUUUCAUGUAGA	scaffold_2:6434759:6434936:-	yes	miR774 is predicted to target transcripts for two genes that encode F-box proteins	Genome Res. 2006 October; 16(10): 1276–1288
	ath-miR774	UCACCCAUAUCUUCAUCUCAA	chr1:22149999:22150181:-	yes
	na	UGAGAAGAAGAUAUGUGAGAU	chr5:15504513:15504659:+	yes
	na	UAGAGAAGAAGAUAUGGGAGA	chr3:3591801:3592141:-	yes
miR5028	ath-miR5028	CAAUUGGGUUUAUGCUAGAGU	chr4:6546672:6546800:-	yes	tha-miR5028	CAAUCGGGUUUAUGCUAGAGC	scaffold_13:6318723:6318935:-	yes	na	J Exp Bot. 2011 Mar;62(5):1611-20
	na	AAUUGUCUAUAUGCUAGAGUU	chr1:17037984:17038157:+	yes
	na	AAUUGUCUAUAUGCUAGAGUU	chr2:2669000:2669154:+	yes
	na	AAUUGUCUAUAUGCUAGAGUU	chr2:2641738:2641892:+	yes
	na	AAUUGUCUAUAUGCUAGAGUU	chr2:7011318:7011491:+	yes
miR5025	na	ACUGUAUAUAUGUAACUGGGA	chr3:19730502:19730653:+	yes	tha-miR5025a	CACUGUAUAUAUCAAAGUCAC	scaffold_9:2831775:2831988:-	yes	target on AT2G48010, which is involved in phosphorylation, protein phosphorylation, signal transduction	Journal of Experimental Botany, Vol. 62, No. 5, pp. 1611–1620, 2011
	na	AUUGUAUAUAUGUAAAUUACA	chr5:26107274:26107554:+	yes	tha-miR5025b	UAAUGUAUAUAUGUAAAUAAC	scaffold_4:11108651:11108738:-	yes
	ath-miR5025	ACUGUAUAUAUGUAAGUGACA	chr1:16993903:16994015:+	yes	tha-miR5025c	AAUGUUUAUAUGUAACUGACA	scaffold_17:1836214:1836485:+	yes
	na	UAUGUAUAUAUGUAAGUUACA	chr4:5811950:5812071:+	yes
	na	ACUAUAUAUAUGUAUGUGUCA	chr5:21651643:21651821:+	yes
miR841	ath-miR841	UCAAUUUCUAGUGGGUCGUAU	chr4:7885278:7885434:-	yes	tha-miR841	UCAUUUUCUAGUGGGUCAUAU	scaffold_15:7001637:7001721:-	yes	Targets bind complex carbohydrates and are thought to be involved in initiating pathogen defense responses	Genes Dev. 2006 December 15; 20(24): 3407–3425
	ath-miR841b	UCAGUUUCCAGUGGCUCGUAU	chr4:2184303:2184459:-	yes
miR159/319	na	CUUUGGUUUGAAGGGGGCUCU	chr2:14369077:14369423:-	yes	tha-miR159a	GAUUGGACUGAAGGGAGCUCC	scaffold_3:4841404:4841617:-	yes	Target on MYB family of transcription factors	J Exp Bot. 2011 Mar;62(5):1611-20.
	ath-miR159c	UUUGGAUUGAAGGGAGCUCCU	chr2:18994624:18994867:+	yes	tha-miR159b	AUUUCGAUUGGAGGUAGCUCU	scaffold_5:10756864:10757020:-	yes
	na	AUUUUGAUUGAAAGGAGCUGU	chr5:9239703:9239909:-	yes	tha-miR159c	GUGUGGAUUGAAGGAAGCUCU	scaffold_8:10061362:10061590:-	yes
	ath-miR319b	GCUUGGACUGAAGGGAGCUCC	chr5:16660449:16660658:-	yes	tha-miR159d	UGUGGAUUGAAGGGAGCUCUA	scaffold_9:5419053:5419304:+	yes
	ath-miR159a	uuuggauugaagggagcucua	chr1:27713233-27713416:-	na	tha-miR159e	UUUGGACUGAAGGGAGCUCCU	scaffold_10:10950425:10950647:+	yes
	ath-miR159b	uuuggauugaagggagcucuu	chr1: 6220646-6220841:+	na	tha-miR159f	UUUGGAUUGAAGGGAGCUCCU	scaffold_22:1140811:1141032:+	yes
miR780	ath-miR780	UUUCUUCGUGAAUAUCUGGCA	chr4:8504135:8504321:-	yes	tha-miR780	UUCUUCAUGAAUACCUGGCAG	scaffold_17:5134715:5134873:+	yes	cation/hydrogen antiporter gene CHX18	PLoS ONE. 2007; 2(2): e219
	na	AUCUUCGUGACUAUUUGGCAU	chr5:14841402:14841522:+	yes
	na	UCUAGGAGUUGUUGAGCGGGU	chr4:17283564:17283788:+	yes
miR4221		UUUUCCUCUGUUGAAUUCUUGC	chr4:8460526:8460667:+	yes	tha-miR4221a	UUUUCCUCUGUAGACUUCUUGC	scaffold_4:13543609:13544011:+	yes	target on AT4G14746, which has EGF domain	Plant Cell. 2010 Apr;22(4):1090-103. Epub 2010 Apr 20
					tha-miR4221b	UUUUCCUCUGUAGACUUCUUGC	scaffold_4:13530845:13531238:+	yes
					tha-miR4221c	GUUUUCAUUUGUUGUAUUCUUG	scaffold_4:15471767:15471934:-	yes
miR773		GUUUGAUUCCAGCUUUUGUCU	chr1:13050705:13050824:-	yes	tha-miR773	UGGCAAUAACAUAAGAAAAC	scaffold_9:6109799:6110086:-	unlikely	Target on DNA (cytosine-5-)- methyltransferase	Genome Res. 2006. 16: 1276-1288
		UUUGCUUCCAGCUUUUGUCUC	chr1:13067235:13067354:+	yes
miR397	na	UUCAUUAAGUGCAGCGUUGAC	chr2:15935801:15936151:-	yes	tha-miR397a	AUCAUUGAGUGCAGCGUUGAU	scaffold_3:2011758:2011889:-	yes
	na	GUCAUUAAGUGCAGCAUUGAU	chr5:24169058:24169464:-	yes	tha-miR397b	GUCAUUGAGUGCAGCGUUGAU	scaffold_3:2017451:2017583:-	yes
	ath-miR397a	UCAUUGAGUGCAGCGUUGAUG	chr4:2625940:2626069:+	yes	tha-miR397c	GCAUUGAUCGCAUCGUUGAUG	scaffold_12:320876:321041:+	yes
	ath-miR397b	AUCAUUGAGUGCAUCGUUGAU	chr4:7878640:7878771:-	yes	tha-miR397d	UCAUCGAGUGCAGCAUUGAUC	scaffold_10:4649514:4649798:+	yes
miR864	ath-miR864	UAAAGUCAAUAAUACCUUGAAG	chr1:6740483:6740611:+	yes		GUCAGGUAUGAUUGACUUUUC	scaffold_6:4803790:4803914:-	yes	Target on triacylglycerol lipase	PLoS ONE 2(2): e219. doi:10.1371/journal.pone.0000219
	na	UGAAGUCAAUGAUGCCUUGAAG	chr1:1727565:1727902:+	yes
miR166/165	ath-miR166g	UCGGACCAGGCUUCAUUCCCC	chr5:25504795:25504923:+	yes	tha-miR166a	UCGGACCAGGCUUCAUUCCCC	scaffold_2:2890642:2890783:+	yes	Target on HD-ZIPIII transcription factor	PLoS ONE 2(2): e219. doi:10.1371/journal.pone.0000219
	ath-miR165a	CUCGGACCAGGCUUCAUCCCC	chr1:78912:79051:-	yes	tha-miR166b	UCGGACCAGGCUUCAUUCCCC	scaffold_2:2892571:2892704:+	yes
	ath-miR166b	UCGGACCAGGCUUCAUUCCCC	chr3:22922192:22922342:+	yes	tha-miR166c	CUCGGACCAGGCUUCAUUCCC	scaffold_6:1539129:1539257:-	yes
	ath-miR166a	UCGGACCAGGCUUCAUUCCCC	chr2:19176108:19176282:+	yes	tha-miR166d	CUCGGACCAGGCUUCAUCCCC	scaffold_5:15258725:15258868:-	yes
	ath-miR166f	UCGGACCAGGCUUCAUUCCCC	chr5:17516290:17516419:+	yes	tha-miR166e	GUCGGAUCAGGCUUCAUUCCC	scaffold_17:1376998:1377110:-	yes
	ath-miR166e	GUCGGACCAGGCUUCAUUCCC	chr5:16775504:16775677:-	yes	tha-miR166f	UCGGACCAGGCUUCAUUCCCC	scaffold_22:1329544:1329727:+	yes
	ath-miR165b	GUCGGACCAGGCUUCAUCCCC	chr4:369836:370010:-	yes	tha-miR166g	GUCGGACCAGGCUUCAUUCCC	scaffold_19:528598:528751:-	yes
	ath-miR166c	ucggaccaggcuucauucccc	chr5:2838635-2838773:+	na	tha-miR166h	UCGGACCAGGCUUCAUUCCCC	scaffold_14:2294318:2294495:+	yes
	ath-miR166d	ucggaccaggcuucauucccc	chr5:2840622-2840734:+	na	tha-miR166i	UCGGACCAGGCUUCAUUCCUC	scaffold_3:546347:546499:+	yes
miR391	ath-miR391	UUCGCAGGAGAGAUAGCGCCA	chr5:24293140:24293252:+	yes	tha-miR391	CUUCGCAGGAGAGAUAGCGCC	scaffold_2:8061949:8062061:-	yes	Target on TAS3	PLoS ONE 2(2): e219. doi:10.1371/journal.pone.0000219
miR5016	na	GUUAUUUUGGAUUCAUUGGAA	chr2:14715699:14715939:-	yes	tha-miR5016a	CUUCUUGUGCAUGUCUUGGAA	scaffold_1:17558111:17558446:-	yes	na	Journal of Experimental Botany, Vol. 62, No. 5, pp. 1611–1620, 2011
	na	GAUCUUGUGGGUUCGUUGGAA	chr2:16556823:16556973:-	yes	tha-miR5016b	GAUCUUGUGGAUGCUUUGGAA	scaffold_13:2998791:2998909:-	yes
	ath-miR5016	uucuuguggauuccuuggaaa	chr2: 9919984-9920197:+	na	tha-miR5016c	CUUCUUGUGGAUUGCUUGAAC	scaffold_1:9904491:9904619:-	yes
					tha-miR5016d	AUUCUUGUGGAGUGCUUGGAA	scaffold_8:8575796:8576193:-	yes
miR5013	ath-miR5013	UUUGUGACAUCUAGGUGCUUU	chr2:7166858:7166939:+	yes	tha-miR5013a	UUUGUGAUAUCUUGGUGUUUU	scaffold_3:7722283:7722415:+	yes	Target on AT3G60580 C2H2-like	Journal of Experimental Botany, Vol. 62, No. 5, pp. 1611–1620, 2011
					tha-miR5013b	UUGGUGAAAUCUUGGUGCUUU	scaffold_9:393008:393226:+	yes
miR851	ath-miR851	GUGGGUGGCAAACAAAGACGA	chr3:19659557:19659687:-	yes	tha-miR851	UUGGGCGGGAAACAAAGAUGA	scaffold_5:10802803:10802899:-	yes	na	PLoS ONE 2(2): e219. doi:10.1371/journal.pone.0000219
miR393	na	UCCAAAGGGAUCGCAUUGUCUC	chr3:23273717:23273987:+	unlikely	tha-miR393a	UCCAAAGGGAUCGCAUUGUUUG	scaffold_6:6271689:6271783:+	yes	Transport inhibitor response 1 (TIR1)/Auxin F-box (AFB)	PLoS ONE 2(2): e219. doi:10.1371/journal.pone.0000219
	ath-miR393b	UCCAAAGGGAUCGCAUUGAUCC	chr3:20691637:20691819:+	yes	tha-miR393b	AUCCAAAGGGAUCGCAUUGAUC	scaffold_16:74485:74659:-	yes
	ath-miR393a	UCCAAAGGGAUCGCAUUGAUCC	chr2:16652091:16652246:+	yes	tha-miR393c	UCCAAAGGGAUCGCAUUGAUCC	scaffold_10:10483751:10483911:+	yes
						AUCCAAAGGGAUCGCAUUGUUU	scaffold_5:11169208:11169294:-	yes
miR1887	na	UACUAAGUAGGGGCUAAGAAA	chr1:4600530:4600676:+	yes	tha-miR1887	UAAUAAGUAGAGUAUAGGAGA	scaffold_8:1092358:1092737:+	yes	target on AT4G09840.1, unkonwn protein	Nature Biotechnology 26, 941 - 946 (2008)
	ath-miR1887	UACUAAGUAGAGUCUAAGAGA	chr4:11370248:11370342:+	yes
miR5020	na	UGGAAGAAGCUGAGUCUUGCA	chr5:12967625:12967965:+	yes	tha-miR5020a	AUGGAAGAAAGUGAGAUAUGC	scaffold_2:3931151:3931349:-	yes	na	Journal of Experimental Botany, Vol. 62, No. 5, pp. 1611–1620, 2011
	na	UGGAAGAAGCUGAGUCUUGCA	chr4:1978122:1978274:+	yes	tha-miR5020b	GGGGAAGAAUUUGAGACUUGC	scaffold_2:1684610:1685028:-	yes
	ath-miR5020a	uggaagaaggugagacuugca	chr4: 6791301-6791470:-	na
	ath-miR5020b	auggcaugaaagaaggugaga	chr4: 6787003-6787153:-	na
	ath-miR5020c	uggcauggaagaaggugagac	chr2: 4770538-4770646:+	na
miR398	ath-miR398b	GUGUGUUCUCAUAUCAACCCU	chr5:4691012:4691146:-	yes	tha-miR398a	UGUGUUCUCAUAUCACUCCUU	scaffold_6:6956483:6956589:+	yes	Target on Copper superoxide dismutase (CSD) and Cytochrome-c oxidase	PLoS ONE 2(2): e219. doi:10.1371/journal.pone.0000219
	ath-miR398c	UGUGUUCUCAGGUCACCCCUG	chr5:4694686:4694819:+	yes	tha-miR398b	CGUGAUCUCAGGUCACACCUU	scaffold_13:4072581:4072764:+	yes
	ath-miR398a	UGUGUUCUCAGGUCACCCCUU	chr2:1040930:1041053:+	yes	tha-miR398c	AUGUGUUCUCAUGUCUACCCU	scaffold_2:4759539:4759673:-	yes
miR828	ath-miR828	UCUUGCUUAAAUGAGUAUUCCA	chr4:13847000:13847135:+	yes	tha-miR828	UUCUUGCUUAAAUGAGUAUUCC	scaffold_1:5271561:5271704:-	yes	Target on Dicer-like (DCL)	PLoS ONE 2(2): e219. doi:10.1371/journal.pone.0000219
	na	UCUUGUUCAAAUGAGUAUUCCA	chr5:21343450:21343620:+	yes
miR162	ath-miR162a	AUCGAUAAACCUCUGCAUCCA	chr5:2634916:2635039:-	yes	tha-miR162a	AUCGAUAAACCUCUGCAUCCA	scaffold_2:2641937:2642078:-	yes	mir162 which target DCL1 mRNA and mir168 which target AGO1 mRNA reduced their expression in the roots of plants subjected to water deficit	BMC Plant Biology 2011, 11:79doi:10.1186/1471-2229-11-79
	ath-miR16b	AUCGAUAAACCUCUGCAUCCA	chr5:7740590:7740716:-	yes	tha-miR162b	AUCGAUAAACCUCUGCAUCCA	scaffold_6:2732097:2732236:-	yes
					tha-miR162c	UCGAUAUACCUAUGGAUCCAG	scaffold_5:449853:449979:+	yes
miR779	ath-miR779	UGAUUGGAAAUUUCGUUGACU	chr2:9560763:9560897:+	yes	tha-miR779a	UUGUUUUGAAAUUUCGUUCAC	scaffold_2:10879315:10879691:-	yes	na	PLoS ONE 2(2): e219. doi:10.1371/journal.pone.0000219
	na	ACUCUGCUAUGUUGCUCGUCA	chr2:6231502:6231646:-	yes	tha-miR779b	UGUCUGUUGUGUUGCUGCUCA	scaffold_16:2766846:2766987:-	yes
	na	UUGUGUUAUGUUGCUACUCAU	chr4:4327022:4327277:+	yes
miR160	ath-miR160a	UGCCUGGCUCCCUGUAUGCCA	chr2:16340262:16340383:+	yes	tha-miR160a	GUGCCUGGCUCCCUGUAUGCC	scaffold_1:9864399:9864522:-	yes	Target on Auxin response factor (ARF)	PLoS ONE 2(2): e219. doi:10.1371/journal.pone.0000219
	ath-miR160c	AUGCCUGGCUCCCUGUAUGCC	chr5:19009076:19009199:-	yes	tha-miR160b	UGCCUGGCUCCCUGUAUGCCA	scaffold_10:10128504:10128625:+	yes
	ath-miR160b	UGCCUGGCUCCCUGUAUGCCA	chr4:9888966:9889089:+	yes	tha-miR160c	AUGCCUGGCUCCCUGUAUGCC	scaffold_20:2068305:2068427:-	yes
miR822	ath-miR822	CUGCGGGAAGCAUUUGCACAU	chr5:897037:897344:-	yes	tha-miR822a	CUGCGAGGAGCGUUUGCACAU	scaffold_2:856359:856657:-	yes	na	PLoS ONE 2(2): e219. doi:10.1371/journal.pone.0000219
					tha-miR822b	UUGCGUGGAGCAUUCGCACAU	scaffold_15:1257317:1257729:-	unlikely
miR860	na	UAAAUAGAUUGGACUAGGUGU	chr2:13016548:13016657:+	unlikely	tha-miR860a	UCAUUGGAUUGGAUUAUGUAU	scaffold_1:18906046:18906428:+	unlikely	Target on histone deacetylase, ferrochelatase, RNA recognition motif	PLoS ONE 2(2): e219. doi:10.1371/journal.pone.0000219
	ath-miR860	UCAAUAGAUUGGACUAUGUAU	chr5:9098793:9098917:+	yes	tha-miR860b	UUCAAUAGAUUGGACAAUAUA	scaffold_6:3799432:3799560:-	yes
					tha-miR860c	AUUAAUAGAUAAGACUAUGUA	scaffold_5:11606247:11606418:-	unlikely
ath-miR167	ath-miR167a	GUGAAACUGCGAACAUGAUCU	chr3:8108079:8108201:-	yes	tha-miR167a	UGAAGCUGCCAGCAUGAUCUA	scaffold_13:868555:868696:-	yes	Auxin response factor (ARF)	PLoS ONE 2(2): e219. doi:10.1371/journal.pone.0000219
	ath-miR167c	UUAAGCUGCCAGCAUGAUCUU	chr3:1306611:1306792:-	yes	tha-miR167b	CUGAAGCUGCCAGGUUGAUCU	scaffold_17:4686132:4686351:-	yes
	ath-miR167b	GAAGCUGCCAGCAUGAUCUAU	chr3:23406157:23406290:+	yes	tha-miR167c	GUGAAUCUGCCAACAGGAUCU	scaffold_14:5531430:5531597:-	yes
	ath-miR167d	GAAGCUGCCAGCAUGAUCUGG	chr1:11137536:11137920:+	yes	tha-miR167d	UGAAGCUGCCAGCAUGAUCUA	scaffold_19:56968:57102:-	yes
					tha-miR167e	UAAGCUGCCAGCAUGAUCUUG	scaffold_13:8096157:8096344:+	yes
					tha-miR167f	GAAGCUGCCAGCAUGAUCUAA	scaffold_17:630506:630626:+	yes
miR829	ath-miR829	UCAAAUUAAAGCUUCAAGGUA	chr1:11834053:11834194:-	yes	tha-miR829a	UAAAUGAAAGCUUCAAGGGAG	scaffold_3:11251157:11251426:+	yes	na	PLoS ONE 2(2): e219. doi:10.1371/journal.pone.0000219
	na	UCAUAUCAAAGCUUCAAGGUA	chr1:11837395:11837539:-	yes	tha-miR829b	GUAAAUGAAAGCUUCAAGGGA	scaffold_12:6500583:6500853:-	yes
miR156/157	ath-miR156f	UGACAGAAGAGAGUGAGCAC	chr5:9136106:9136238:+	yes	tha-miR157a	CUGACAGAAGAGAGUGAGCA	scaffold_1:3805364:3805486:-	yes	Target on squamosa-promoter binding protein-like (SPL) gene	PLoS ONE 2(2): e219. doi:10.1371/journal.pone.0000219
	ath-miR156e	UGACAGAAGAGAGUGAGCAC	chr5:3867193:3867331:+	yes	tha-miR157b	UGACAGAAGAGAGUGAGCAC	scaffold_1:3452779:3452904:+	yes
	ath-miR156b	UGACAGAAGAGAGUGAGCAC	chr4:15074925:15075047:+	yes	tha-miR157c	CGACAGAAGAGAGUGAGCAC	scaffold_11:104837:104964:+	yes
	ath-miR157a	UUGACAGAAGAUAGAGAGCA	chr1:24913184:24913316:-	yes	tha-miR157d	UGACAGAAGAGAGUGAGCAC	scaffold_6:3821516:3821648:+	yes
	ath-miR157b	uugacagaagauagagagcac	chr1: 24921086-24921217:+	na	tha-miR157e	UUGACAGAAGAUAGAGAGCA	scaffold_9:9304808:9304939:-	yes
	ath-miR156c	CUGACAGAAGAGAGUGAGCA	chr4:15415406:15415531:-	yes	tha-miR157f	UGACAGAAGAUAGAGAGCAC	scaffold_9:9318601:9318732:+	yes
	ath-miR156a	CUGACAGAAGAGAGUGAGCA	chr2:10676450:10676574:-	yes	tha-miR157g	UGACAGAAGAUAGAGAGCAC	scaffold_13:3051830:3052047:+	yes
	ath-miR157c	UUGACAGAAGAUAGAGAGCA	chr3:6244506:6244713:-	yes	tha-miR157h	CUGACAGAAGAGAGUGAGCA	scaffold_15:4948287:4948426:-	yes
	ath-miR157d	CUGACAGAAGAUAGAGAGCA	chr1:18026816:18027029:-	yes	tha-miR157i	UUGACAGAAGAGAGUGAGCA	scaffold_2:3514672:3514800:-	yes
	ath-miR156d	UUGACAGAAGAGAGUGAGCA	chr5:3456625:3456753:-	yes
	ath-miR156g	GCGACAGAAGAGAGUGAGCA	chr2:8412504:8412629:-	yes
	ath-miR156h	ugacagaagaaagagagcac	chr5: 22597012-22597117:-
miR390	ath-miR390b	GGAACUCAGGAUGGAUAGCGC	chr5:23636939:23637073:-	yes	tha-miR390a	AAAGCUCAGGAGGGAUAGCGC	scaffold_2:8867472:8867580:-	yes	Target on TAS3	PLoS ONE 2(2): e219. doi:10.1371/journal.pone.0000219
	ath-miR390a	GAAACUCAGGAUGGAUAGCGC	chr2:16061949:16062062:-	yes	tha-miR390b	GAAACUCAGGAUGGACAGCGC	scaffold_10:9718510:9718622:-	yes
miR3440	na	UUUUUCUUGGCACCUCCAUUU	chr2:1494929:1495255:-	yes	tha-miR3440	UGGAUUCUUCAAGGGAAGCUU	scaffold_4:8999511:8999803:+	yes	target on AT5G08490, Tetratricopeptide repeat (TPR)-like superfamily protein	Nucl. Acids Res. (2010) 38 (20):6883-6894.doi: 10.1093/nar/gkq590
	ath-miR3440b	UGGAUUGGUCAAGGGAAGCGU	chr3:6217479:6217600:+	yes
miR403	ath-miR403	UUAGAUUCACGCACAAACUCG	chr2:19415057:19415195:+	yes	tha-miR403	UUAGAUUCACGCACAAACUCG	scaffold_22:1579827:1579949:+	yes	Target on Argonaute (AGO)	PLoS ONE 2(2): e219. doi:10.1371/journal.pone.0000219
miR414	na	UCAUCUUCUUCUUCAUCAUCA	chr2:16448499:16448726:+	unlikely	tha-miR414a	UCUUCAUCAUCAUCAUCAUCA	scaffold_15:7109360:7109762:+	yes	Target on F-box protein family	Genome Biol.Â 2004;Â 5(9): R65.
	ath-miR414	ucaucuucaucaucaucguca	chr1:25137456-25137563:-	na	tha-miR414b	AUCAUCAUCAUCAUCAUGUUC	scaffold_1:3553309:3553625:-	unlikely
miR830	ath-miR830	CUAACUAUUUUGAGAAGAAGU	chr1:4820386:4820515:-	yes	tha-miR830	AAAUUAUUUUGACAAGAAGUG	scaffold_13:2979678:2979951:+	yes	na	PLoS ONE 2(2): e219. doi:10.1371/journal.pone.0000219
miR2111	ath-miR2111a	GUCCUCGGGAUGCGGAUUACC	chr3:2854291:2854435:+	yes	tha-miR2111a	AAUCCUCGGGAUGCGGAUUAC	scaffold_13:6545861:6546009:-	yes	high abundance of miR2111 in phloem sap during Pi limitation, predicted to target the E3 ligase gene At3g27150	Plant Physiology 150:1541-1555 (2009)
	na	UAAUCUGCAUCUUGACGUAUA	chr2:1319926:1320015:+	yes	tha-miR2111b	AUCCUCGGGAUACAGAUUACC	scaffold_2:428924:429046:+	yes
	ath-miR2111b	AUCCUCGGGAUACAGUUUACC	chr5:400382:400505:+	yes	tha-miR2111c	GUAAUUUGCAUUCUGAGGUUC	scaffold_2:5156786:5157090:-	yes
miR868	ath-miR868	CUUCUUAAGUGCUGAUAAUGC	chr3:6488389:6488665:+	yes	tha-miR868	CUUCUUAAGUGCUAAUAAUUU	scaffold_22:265344:265469:+	yes	na	PLoS ONE 2(2): e219. doi:10.1371/journal.pone.0000219
miR870	ath-miR870	CUAAUUUGGUGUUUCUUCGAU	chr5:21395535:21395679:-	yes	tha-miR870	AUAAUUUGUUGUUUCUUCUCU	scaffold_16:3351633:3351894:-	unlikely	na	PLoS ONE 2(2): e219. doi:10.1371/journal.pone.0000219
	na	UAAUUUCAUGUUUCUUCGAUU	chr1:5982370:5982749:+	yes
miR827	ath-miR827	UUUAGAUGACCAUCAACAAAC	chr3:22122791:22122904:-	yes	tha-miR827a	UUAUAUGAUCAUCAACAAACA	scaffold_1:11701451:11701631:+	yes	Target on SPX domain/Zinc finger(C3HC4 type)	PLoS ONE 2(2): e219. doi:10.1371/journal.pone.0000219
					tha-miR827b	UUAGAUGACCAUCAACAAACG	scaffold_19:1282364:1282477:+	yes
miR394	ath-miR394a	UUGGCAUUCUGUCCACCUCC	chr1:7058187:7058319:+	yes	tha-miR394a	UUUGGCAUUCUGUCCACCUC	scaffold_5:8491404:8491547:-	yes	Target on F-box	PLoS ONE 2(2): e219. doi:10.1371/journal.pone.0000219
	ath-miR394b	AUUGGCAGUAUGCCCACCUC	chr1:28568810:28568925:-	yes	tha-miR394b	UUUGGCAUUCUGUCCACCUC	scaffold_9:1977466:1977600:-	yes
miR2937	ath-miR2937	AUAAGAGCUGUUGAAGGAGUC	chr5:13622556:13622700:+	yes	tha-miR2937	GAGAAGAGCUGUUGAAGCAGC	scaffold_19:1163645:1164048:-	yes	Target on AT3G12890, ASML2 protein	BMC Genomics 2009, 10:643doi:10.1186/1471-2164-10-64
	na	UAGAAGAGGUGUUGAAGGAGC	chr3:4098999:4099386:-	yes
miR5015	na	UCUUUUGUUUUUGGUUUUAUG	chr5:17110978:17111336:+	yes	tha-miR5015	AUUGUUGUUUUAUGUAGUCUU	scaffold_8:2701260:2701383:-	yes	target on AT2G38320, AT1G12860, AT2G01760, AT5G38740	Journal of Experimental Botany, Vol. 62, No. 5, pp. 1611–1620, 2011
	na	UUGGUGUUAUGAGUGGUGUUC	chr1:13867712:13867798:+	unlikely
	ath-miR5015a	uugguguuauguguagucuuc	chr5: 20554881-20555053:+	na
miR164	ath-miR164a	UGGAGAAGCAGGGCACGUGCA	chr2:19520750:19520870:+	yes	tha-miR164a	CGGAGAAGCAGGUCACGUGAG	scaffold_6:5457688:5457884:+	yes	Target on NAC domain transcription factor	PLoS ONE 2(2): e219. doi:10.1371/journal.pone.0000219
	ath-miR164c	UGGAGAAGCAGGGCACGUGCG	chr5:9852664:9852788:+	yes	tha-miR164b	CUGGAGAAGCAGGGCACGUGC	scaffold_6:4116889:4117013:-	yes
	ath-miR164b	UGGAGAAGCAGGGCACGUGCA	chr5:287566:287757:+	yes	tha-miR164c	UGGAGAAGCAGGGCACGUGCA	scaffold_22:1698371:1698493:+	yes
					tha-miR164d	GUAAAGAAGCAGGGAACGUGC	scaffold_1:1692781:1693200:-	yes
miR2938	na	AGAUCUUUUGAGAUUGUUCGA	chr1:23759595:23759929:-	yes	tha-miR2938	GAUCUUUUGAGAGGGUGCCAG	scaffold_2:10721842:10721939:+	yes	Target on AT3G63350, regulation of transcription, DNA-dependent, response to heat, response to high light intensity	BMC Genomics 2009, 10:643doi:10.1186/1471-2164-10-643
	ath-miR2938	UGAUCUUUUGAGAGGGUUCCA	chr5:22251817:22251926:-	yes
miR5029	ath-miR5029	AAUGAGAGAGAACACUGCAAA	chr5:12268534:12268676:+	yes	tha-miR5029a	ACUGAGAGAGAACACUGAAGA	scaffold_15:215611:215994:+	yes	Target on AT2G30070, potassium ion transmembrane transport, and AT4G02900, ERD (early-responsive to dehydration stress) family protein	Journal of Experimental Botany, Vol. 62, No. 5, pp. 1611–1620, 2011
	na	CAAUAAGAGAGAAAACUGUAA	chr1:7097300:7097384:-	yes	tha-miR5029b	AAUGAGAGAGAAAAAGGCAAA	scaffold_10:11716632:11716804:+	yes
