# Supplementary material for: The Reference Genome of the Halophytic Plant Eutrema salsugineum
Source: Front Plant Sci. 2013 Mar 21;4:46. doi: 10.3389/fpls.2013.00046 (PMC3604812; doi:10.3389/fpls.2013.00046)
Supplement: Supplementary Table S3 — Comparison of translational efficiency among the gene families between the A. thaliana and E. salsugineum. [file 45219_Schumaker_DataSheet3.XLSX]

## Sheet: Sheet1
Table S3. Comparison of translational efficiency among the gene families between the two species
Gene Family	At_list_length	At_data_length	Es_list_length	Es_data_length	Mean_tAI_At	SD_tAI_At	Mean_tAI_Es	SD_tAI_Es	P_value
Organic Solute Cotransporters	282	282	266	266	0.0752363	0.0121536	0.0803108	0.0126423	1.92421e-06
ABC transporters	99	99	89	89	0.0659638	0.00738737	0.0705572	0.00895198	0.000124054
Miscellaneous Membrane Protein Families	486	486	476	476	0.0756597	0.0144196	0.0787941	0.0153807	0.00111017
Subtilisin-like Serine Proteases	56	56	50	50	0.0693967	0.00716272	0.0741177	0.00852993	0.0012821
Receptor kinase-like protein family	361	361	336	336	0.0669427	0.00941932	0.0690004	0.0102214	0.00593788
GeBP Transcription Factor Family	19	19	8	8	0.0699878	0.00988847	0.0820246	0.0111622	0.00667275
GRAS Transcription Factor Family	32	32	34	34	0.079055	0.00960316	0.0855022	0.0117938	0.00744273
Inorganic Solute Cotransporters	92	92	96	96	0.0764439	0.0119239	0.0813678	0.0138501	0.00986854
Glycoside Hydrolase Gene Families	383	383	359	359	0.0743345	0.0108185	0.0762424	0.0120068	0.00990664
Nodulin-like protein family	66	66	66	66	0.0685235	0.014201	0.0731999	0.0132176	0.0103267
RRE (Rapid Response to Elicitors)	4	4	4	4	0.0858145	0.00624657	0.0975872	0.00613111	0.0142857
EF-hand containing proteins	228	228	209	209	0.0719238	0.0133329	0.0742945	0.0134304	0.015274
Monosaccharide transporter-like gene family	53	53	48	48	0.0729429	0.0133414	0.0778683	0.0127152	0.0282278
Glycosyltransferase Gene Families	338	338	309	309	0.0747781	0.0112602	0.0765988	0.011111	0.0294621
C3H Transcription Factor Family	190	190	164	164	0.0801247	0.0148755	0.0840936	0.0171039	0.0346904
Expansins	35	35	36	36	0.0871699	0.0165912	0.0952464	0.0193448	0.0396975
FtsH: AAA ATP-dependent zinc metallopeptidase	24	24	22	22	0.0748623	0.00843891	0.0800899	0.00839718	0.0401847
Type I MADS box	45	45	71	71	0.0716715	0.0133978	0.0794299	0.0193723	0.0414822
Antiporters	70	70	66	66	0.0736291	0.013791	0.0778564	0.0150595	0.0483436
Dof family	36	36	46	46	0.0798051	0.0176635	0.0837563	0.0135779	0.0486867
C2C2-Dof Transcription Factor Family	36	36	46	46	0.0798051	0.0176635	0.0837563	0.0135779	0.0486867
C2H2 Transcription Factor Family	225	225	203	203	0.0719641	0.0130238	0.0746264	0.0144227	0.050883
TCP transcription factor family ?	25	25	25	25	0.0745903	0.0115429	0.0804109	0.011907	0.0517525
Plant U-box protein (PUB)	61	61	53	53	0.064106	0.00895867	0.0668458	0.00989002	0.0527089
CCAAT-HAP2 Transcription Factor Family	10	10	9	9	0.0706564	0.0112728	0.0795695	0.00875422	0.0563771
Plant defensins superfamily	18	18	17	17	0.103384	0.0254879	0.122138	0.0308802	0.0629739
Monolignol Biosynthesis	62	62	69	69	0.072635	0.0122831	0.0749467	0.0102594	0.0655583
AAAP family	43	43	42	42	0.0769862	0.0140134	0.0819445	0.0146062	0.070768
Lipid Metabolism Gene Families	100	100	102	102	0.0797048	0.0144094	0.0823868	0.0162215	0.0718054
JUMONJI Transcription Factor Family	5	5	5	5	0.0643072	0.00241115	0.0676666	0.00359589	0.0753968
TUB Transcription Factor Family	11	11	9	9	0.0689053	0.0100377	0.0760216	0.0116511	0.0759705
Plant Cell Wall Biosynthesis Families	35	35	28	28	0.0734983	0.0107589	0.0772971	0.00963851	0.0786367
Class III peroxidase	74	74	70	70	0.0785298	0.0136579	0.0816571	0.0146623	0.0861264
ACBP60s	7	7	6	6	0.0710185	0.00693651	0.078504	0.00889644	0.0903263
Acyl Lipid Metabolism Family	606	606	587	587	0.0744751	0.0140489	0.0757465	0.0146205	0.0922888
Equilibrative Nucleoside Transporter Family (ENT)	8	8	7	7	0.0596484	0.0139767	0.0688132	0.0171934	0.0946387
PPI	3	3	3	3	0.0616489	0.00215995	0.0648505	0.00125508	0.1
Sucrose-H+ symporters	9	9	7	7	0.0731553	0.0105594	0.0802872	0.0130397	0.105245
WRKY Transcription Factor Family	72	72	67	67	0.0730358	0.0127564	0.075058	0.0124395	0.108011
Chloroplast and Mitochondria gene families	53	53	51	51	0.0849905	0.0174438	0.0893947	0.0162367	0.113246
F-Box Proteins	4	4	3	3	0.0661469	0.0121643	0.0770135	0.00779009	0.114286
Eukaryotic Initiation Factor Gene Family	105	105	91	91	0.0819244	0.0174171	0.0845879	0.0149485	0.118172
EXO70 exocyst subunit family	23	23	23	23	0.0684574	0.00865723	0.0714882	0.00793167	0.118999
BZR Transcription Factor Family	6	6	6	6	0.0716448	0.0139777	0.0848353	0.0170009	0.12013
WRKY Transcription Factor Superfamily	70	70	65	65	0.0732701	0.0127918	0.075081	0.0126314	0.134033
ARF Transcription Factor Family	22	22	16	16	0.0717852	0.0138336	0.0771124	0.0144134	0.135567
COBRA Gene Family	11	11	11	11	0.0726561	0.00944649	0.0757287	0.00876086	0.149993
AGC Family	39	39	38	38	0.0671606	0.00813084	0.0696331	0.00936543	0.151456
PHD Transcription Factor Family	13	13	11	11	0.0635329	0.0101683	0.0678873	0.0116042	0.15156
HSF Transcription Factor Family	22	22	25	25	0.0728182	0.0161207	0.0760564	0.0119116	0.157173
Heat Shock Transcription Factor Family	22	22	25	25	0.0728182	0.0161207	0.0760564	0.0119116	0.157173
C2C2-Gata Transcription Factor Family	30	30	30	30	0.07638	0.0176625	0.0817438	0.0171248	0.164017
Non-SMC Element family	2	2	2	2	0.0675572	0.00235837	0.0758599	0.000653929	0.166667
TGA3-like	4	4	4	4	0.0719251	0.00716214	0.0768317	0.00865158	0.171429
MADS Transcription Factor Family	114	114	123	123	0.0731209	0.0148435	0.0763064	0.0192281	0.174687
MADS-box Transcription Factor Family	114	114	123	123	0.0731209	0.0148435	0.0763064	0.0192281	0.174687
Family of Arabidopsis genes related to Xyloglucan Fucosyltransferase1	14	14	15	15	0.0682884	0.00708536	0.0715381	0.00797026	0.176777
Aquaporin Families	36	36	32	32	0.0924721	0.018877	0.0970636	0.0165361	0.177953
Trihelix Transcription Factor Family	27	27	24	24	0.0714199	0.0127532	0.0740865	0.0112152	0.186609
NADPH P450 reductases	4	4	3	3	0.0715932	0.00737126	0.0802783	0.0104685	0.2
Short Under Blue Light (SUBs)	3	3	2	2	0.0844243	0.0040308	0.0887888	0.00243988	0.2
MIP family	39	39	35	35	0.0913507	0.0189147	0.0953989	0.0169406	0.200314
Ion Channel Families	61	61	58	58	0.0741293	0.00843188	0.0751725	0.0112038	0.210283
G2-like Transcription Factor Family	39	39	39	39	0.0663524	0.0111518	0.0697095	0.014645	0.221871
MAP Kinase Kinase (MAPKK) Family	10	10	9	9	0.0712352	0.0068542	0.0764053	0.0138582	0.223484
ARID Transcription Factor Family	7	7	7	7	0.0725445	0.00472831	0.0757248	0.00866346	0.227855
SBP Transcription Factor Family	17	17	16	16	0.0748332	0.00674645	0.0773645	0.0108138	0.241188
Superfamily of zinc-coordinating DNA-binding proteins	17	17	16	16	0.0748332	0.00674645	0.0773645	0.0108138	0.241188
CBL-interacting serione-threonine Protein Kinases (AtCIPKs)	26	26	27	27	0.0672592	0.0115776	0.0698747	0.0130648	0.242674
Hypothetical proteins	4	4	4	4	0.0805425	0.00843413	0.0864137	0.01701	0.242857
tify family	18	18	14	14	0.0701775	0.0148183	0.0725668	0.0150628	0.243796
FH2 proteins	23	23	18	18	0.0648319	0.0117365	0.0669641	0.00835097	0.24525
Single gene-encoded CBPs	12	12	13	13	0.0661459	0.0106439	0.0702481	0.0103864	0.251659
MYB	139	139	129	129	0.0719521	0.0133313	0.0728429	0.0116519	0.260963
MYB Transcription Factor Family	138	138	127	127	0.0721691	0.0134446	0.0730311	0.0117438	0.268655
ZF-HD Transcription Factor Family	15	15	14	14	0.0919642	0.0209296	0.0931845	0.016206	0.310433
Homeobox Transcription Factor Family	90	90	92	92	0.07623	0.0127604	0.0768753	0.0132153	0.314679
ARIADNE gene family	15	15	11	11	0.0769323	0.00763802	0.0807299	0.0116665	0.323042
GRF Transcription Factor Family	9	9	9	9	0.0800767	0.0120271	0.0837531	0.0124781	0.333237
Histidine Kinase	16	16	16	16	0.0711764	0.00763729	0.0719997	0.00915476	0.334465
IQD Protein Family	32	32	30	30	0.0690464	0.0141857	0.0699123	0.0125649	0.339927
AP2-EREBP Transcription Factor Family	137	137	129	129	0.0791211	0.0155068	0.080158	0.0148101	0.340962
zinc finger-homeobox gene family	17	17	16	16	0.0949173	0.0212802	0.0973133	0.0190549	0.34133
IDZ Gene Family	11	11	11	11	0.0680996	0.0138286	0.0710464	0.0135562	0.349677
PCBPs	3	3	3	3	0.0576891	0.00832325	0.0626057	0.0131991	0.35
CRKs	3	3	3	3	0.0662097	0.00438054	0.0687183	0.0066572	0.35
CB-HSPs	3	3	3	3	0.0746541	0.0033329	0.0759491	0.0039613	0.35
CAMTA Transcription Factor Family	7	7	6	6	0.0733758	0.0117831	0.0757451	0.00541363	0.365385
Caleosins	7	7	5	5	0.0614239	0.0121914	0.0618795	0.00862811	0.377525
Sulfurtransferasese / Rhodanese Family	18	18	18	18	0.0739123	0.0145364	0.0749947	0.0139274	0.383281
Whirly Transcription Factor Family	3	3	2	2	0.0693895	0.00873958	0.0754827	0.00380552	0.4
SNARE Interacting Proteins	14	14	13	13	0.0742687	0.0138352	0.0736373	0.0155326	0.414992
WOX gene family	16	16	16	16	0.0784976	0.015085	0.078473	0.0155684	0.41903
Phosphoribosyltransferases (PRT)	15	15	15	15	0.0743398	0.0117184	0.0756057	0.01128	0.419067
RCI2 gene Family	8	8	6	6	0.0854096	0.0139147	0.0868899	0.0248029	0.425907
PHD Gene Family	4	4	3	3	0.0739812	0.0135608	0.0751598	0.00382243	0.428571
Antiporter Superfamily	25	25	23	23	0.0702339	0.00976289	0.0725539	0.0124631	0.459294
Glutamine dumper (GDU) family	6	6	6	6	0.0814614	0.0220814	0.0848806	0.0235661	0.468615
EICBPs	6	6	6	6	0.0732488	0.00795046	0.0737837	0.00644936	0.468615
ACA	20	20	17	17	0.0758516	0.00870524	0.0744707	0.00658099	0.470009
Alfin-like Transcription Factor Family	7	7	6	6	0.0875735	0.0148286	0.0876766	0.0138657	0.472611
ABI3VP1 Transcription Factor Family	11	11	12	12	0.0775539	0.0145755	0.0736033	0.00832882	0.487967
14-3-3 proteins	15	15	12	12	0.0848678	0.0159803	0.0829199	0.0127563	0.490434
RAV Transcription Factor Family	11	11	13	13	0.0783636	0.0122059	0.0814961	0.0134778	0.5
Structural Maintenance of Chromosomes family	3	3	3	3	0.0646656	0.00894525	0.06605	0.010895	0.5
Pirin-like proteins	3	3	3	3	0.0679163	0.00282948	0.0732934	0.0115558	0.5
Response Regulator	34	34	35	35	0.0651109	0.0149119	0.064227	0.0162011	0.502378
MLO proteins	15	15	14	14	0.0735968	0.00776296	0.0738638	0.00971122	0.508568
Carbohydrate Esterase Gene Families	99	99	82	82	0.0738932	0.0109655	0.0744828	0.0135868	0.5108
basic region leucine zipper (bZIP) Transcription Factor	67	67	69	69	0.0762751	0.0135514	0.0758184	0.0123339	0.512154
Calcium Dependent Protein Kinase	34	34	33	33	0.0658822	0.00766378	0.0658642	0.00857422	0.512421
CDPKs	34	34	33	33	0.0658822	0.00766378	0.0658642	0.00857422	0.512421
Core DNA replication machinery	60	60	58	58	0.0693133	0.0106776	0.0693661	0.0101272	0.518248
Kinesins	62	62	61	61	0.0619543	0.00668933	0.0622078	0.0064661	0.525209
Cytochrome P450	238	238	198	198	0.0710101	0.010851	0.070815	0.0102224	0.525716
bZIP Transcription Factor Family	66	66	68	68	0.0765494	0.0136946	0.07619	0.0127077	0.527498
EIL Transcription Factor Family	6	6	6	6	0.0769496	0.0158325	0.0766616	0.015842	0.531385
MAP Kinase Kinase Kinase Kinase (MAPKKKK) Family	10	10	9	9	0.0633847	0.00777941	0.0623476	0.00741477	0.547587
MAP Kinase Kinase Kinase (MAPKKK) Family	77	77	72	72	0.0730045	0.0100529	0.0730353	0.0108283	0.555137
Strubbelig Receptor Family	9	9	8	8	0.0611066	0.00755587	0.0612638	0.00647913	0.555821
Leucine-rich repeat extensin	11	11	9	9	0.0831085	0.0162229	0.0841946	0.0129186	0.559008
Magnesium Transporter Gene Family	11	11	9	9	0.0738799	0.00784036	0.0753986	0.00967997	0.559008
Protein tyrosine phosphatase (PTP) family	28	28	33	33	0.0738028	0.00985669	0.073733	0.0106723	0.565608
CNGCs	20	20	21	21	0.0773859	0.00820247	0.0776186	0.0100595	0.566578
bHLH Transcription Factor Family	163	163	162	162	0.0734157	0.0132175	0.0732475	0.0131127	0.576536
basic Helix-Loop-Helix (bHLH) Transcription Factor	165	165	164	164	0.0733504	0.0131507	0.073161	0.0130609	0.58784
Primary Pumps (ATPases) Gene Families	80	80	78	78	0.0790661	0.0127595	0.0791448	0.0141528	0.596842
MYB-Related Transcription Factor Family	2	2	3	3	0.0668151	0.00947304	0.0683421	0.00464914	0.6
HRT Transcription Factor Family	3	3	2	2	0.0674742	0.00629463	0.0681403	0.0107864	0.6
CPP Transcription Factor Family	8	8	8	8	0.062871	0.00516455	0.06192	0.00630933	0.600777
ARR-B Transcription Factor Family	14	14	17	17	0.0733655	0.0124975	0.0715035	0.0116664	0.615391
C2C2-CO-like Transcription Factor Family	28	28	24	24	0.0822369	0.0158964	0.0823961	0.0198912	0.624943
Cytoplasmic ribosomal protein gene family	235	235	236	236	0.100988	0.0216008	0.100254	0.0209401	0.647085
Mechanosensitive Ion Channel Family	12	12	11	11	0.0745525	0.0137344	0.0710087	0.00621692	0.652649
SAURs	5	5	5	5	0.0754156	0.0131822	0.0746133	0.0223212	0.654762
Aldehyde Dehydrogenase Superfamily	14	14	15	15	0.0715526	0.0110082	0.0696939	0.0104366	0.658523
Histidine Phosphotransfer Proteins	8	8	8	8	0.0879651	0.0103112	0.0860615	0.00896409	0.677312
Core Cell Cycle Genes	62	62	63	63	0.0735858	0.0139415	0.0721111	0.0126897	0.697075
C2C2-YABBY Transcription Factor Family	6	6	6	6	0.10084	0.0113058	0.0960858	0.0189279	0.705628
EF-1alpha	5	5	4	4	0.111986	0.00711608	0.11164	0.0013194	0.722222
Trehalose Biosynthesis Gene Families	12	12	12	12	0.0766762	0.00520155	0.0756074	0.00635845	0.724416
Calcineurin B-like Calcium Sensor Proteins (AtCBLs)	10	10	9	9	0.078689	0.0100153	0.0750113	0.0098027	0.725519
AtRKD Transcription Factor Family	5	5	5	5	0.0671845	0.00266579	0.0649614	0.00807287	0.72619
Cytoskeleton	11	11	8	8	0.0924368	0.0133067	0.0878186	0.0102603	0.72762
MADS like gene family	18	18	8	8	0.0724248	0.0174401	0.0696181	0.0146144	0.734609
PP2C-type phosphatases	78	78	70	70	0.0717667	0.0109579	0.0709983	0.0110107	0.739986
SNAREs	57	57	55	55	0.0719077	0.0132245	0.0701994	0.012434	0.750205
NLP Transcription Factor Family	9	9	9	9	0.0730596	0.00738516	0.0719827	0.0100935	0.755286
60S ribosomal L19 proteins	4	4	4	4	0.101355	0.0269369	0.0967873	0.0128161	0.757143
CCAAT-HAP3 Transcription Factor Family	10	10	10	10	0.0788527	0.0114935	0.0749933	0.0123038	0.759374
E2F-DP Transcription Factor Family	7	7	7	7	0.0654715	0.01268	0.0615543	0.00982671	0.772145
Primary Pumps (ATPases) Gene Family (2)	33	33	30	30	0.0863103	0.0158121	0.0850543	0.0179272	0.776172
Myosin	20	20	17	17	0.0665207	0.00440264	0.0653331	0.00412005	0.779162
Phospholipase D (Zarsky group)	11	11	11	11	0.0774128	0.00873391	0.0751885	0.0109672	0.780768
Nicotianamine Synthase	5	5	5	5	0.0827644	0.0122471	0.0754996	0.0109079	0.789682
BBR/BPC Transcription Factor Family	7	7	7	7	0.0776332	0.0118307	0.0744092	0.00928528	0.808566
BBR/BPC-family of GAGA-motif binding transcription factors	7	7	7	7	0.0776332	0.0118307	0.0744092	0.00928528	0.808566
14-3-3s	9	9	8	8	0.0905552	0.014322	0.083144	0.0115732	0.814809
Phospholipase D	12	12	12	12	0.0772549	0.0083454	0.0748152	0.0105365	0.826321
CCAAT-DR1 Transcription Factor Family	2	2	2	2	0.0732865	0.0171708	0.0635969	0.016521	0.833333
VOZ-9 Transcription Factor Family	2	2	2	2	0.0786844	0.0012442	0.0777134	0.00121576	0.833333
Single Myb Histone (SMH)	5	5	5	5	0.0702187	0.00638368	0.0647661	0.00499849	0.845238
NAC Transcription Factor Family	98	98	97	97	0.0725107	0.0116944	0.0705215	0.0139825	0.85705
Glutathione S-transferase Family	54	54	50	50	0.0802655	0.01649	0.075786	0.0162408	0.862089
MAP Kinase (MAPK) Family	21	21	17	17	0.0795568	0.00809754	0.0772906	0.00866857	0.865964
REM Transcription Factor Family	31	31	29	29	0.0687365	0.0124644	0.0659581	0.0153582	0.877735
HSP70s	6	6	6	6	0.107584	0.010827	0.100404	0.0122815	0.87987
Cytochrome b5	7	7	8	8	0.0857326	0.0176178	0.0782379	0.0211401	0.884072
CCAAT-HAP5 Transcription Factor Family	13	13	12	12	0.0870094	0.0155159	0.0803505	0.0139105	0.897457
Polysaccharide Lyase Gene Families	34	34	12	12	0.0763328	0.0104858	0.0708804	0.0114379	0.899751
GAD	6	6	6	6	0.0859453	0.00944084	0.0800863	0.00520089	0.910173
Pollen Coat Proteome	28	28	11	11	0.0747577	0.0180951	0.0693562	0.0148996	0.923501
Rad5/16-like gene family	10	10	7	7	0.0721261	0.0061861	0.0657324	0.00821249	0.956088
AS2 family	41	41	56	56	0.0886525	0.0151938	0.0839667	0.0164349	0.971914
Lateral Organ Boundaries Gene Family	41	41	56	56	0.0886525	0.0151938	0.0839667	0.0164349	0.971914
Orphan Transcription Factor Family	2	2	2	2	0.0860589	0.000370081	0.0778151	0.00945974	1
